# Supplementary material for: Insulin-like growth factor 2 drives fibroblast-mediated tumor immunoevasion and confers resistance to immunotherapy
Source: JCI journal article supplement (doi:10.1172/jci183366), 2024-11-14
Supplement: sd1 [file 1]

# **Insulin-like growth factor 2 drives fibroblast-mediated tumor immuno-evasion and confers resistance to immunotherapy**

**Daqiang Song<sup>1,2#</sup>, Yushen Wu<sup>1,3#</sup>, Jie Li<sup>1#</sup>, Jiazhou Liu<sup>1,5#</sup>, Ziyang Yi<sup>1</sup>, Xiaoyu Wang<sup>1</sup>, Jiazheng Sun<sup>1</sup>, Liuying Li<sup>1</sup>, Qianxue Wu<sup>1</sup>, Yuru Chen<sup>1</sup>, Huiying Fang<sup>1</sup>, Tiankuo Luan<sup>1</sup>, Huimin Du<sup>3</sup>, Jing Huang<sup>4</sup>, Weiyan Peng<sup>1</sup>, Yuxian Wei<sup>5</sup>, Fan Li<sup>5</sup>, Qin Li<sup>6</sup>, Li Zhang<sup>7</sup>, Yong Zhu<sup>8</sup>, Jingyuan Wan<sup>2\*</sup>, Guosheng Ren<sup>1,5\*</sup>, Hongzhong Li<sup>1\*</sup>**

**Supplemental Figures 1-11**

**Supplemental Methods**

**Supplemental Table 1**

**Figure S1. IGF2 is highly expressed in immune-excluded tumors, related to Figure 1.**

(A) Representative IHC images showing expression of CD3 in the immune-inflamed or immune-excluded human tumors. (B) Scatter plot of 9-quadrant association analyses of transcriptomic levels from log2-fold change (Log2 FC) in both TCGA COAD cohort and our COAD cohort. (C) Expression of differentially expressed genes in the tumors across 9 human cancers based on immune exclusion score of TIDE system. (D) The dot plot illustrating the differential enrichment of stromal cells in IGF2-high tumor tissues compared to those in IGF2-low tissues. The red plot representing up-regulated enrichment, the blue plot representing down-regulated enrichment, and the orange plot indicating no significant enrichment. The node size represents the *P* value by the Mann-Whitney U-test (D). *R* value is from Pearson's correlation coefficient (B).

**Figure S2. IGF2 is primarily expressed in CAFs, related to Figure 1.**

(A) Representative IHC images illustrating the expression of IGF2 and CD3 in the immune-inflamed or immune-excluded human TNBC tissues. (B) Correlation between IGF2 and CAFs infiltration in human BRCA and COAD based on TIMER system. (C) UMAP showing IGF2 expression on the cell clusters in the TME of human COAD (GSE179784). (D) IGF2 expression on the cell clusters from human LUAD tumor and adjacent tissues (GSE123904). (E) Flow cytometry analysis showing the IGF2 expression in the CAFs, CD45<sup>+</sup> immune cells, and malignant cells in the TME of EO771 or MC38 tumors (n = 5 mice per group). (F) Expression of IGF2 in human or mouse CAFs and tumor cell lines was detected by western blot. (G) GO analysis showing the enriched biological processes in the immune excluded tumor compared to immune inflamed tumors. (H) The expression of TGFB1 in the immune-inflamed or immune-excluded TNBC and COAD tumors. (I) The correlation between the expression of IGF2 and TGFB1 in the TCGA BRCA and COAD cohorts. (J) GSEA analysis from scRNA-seq or bulk RNA-seq data showing the enriched TGF- $\beta$  signaling in the WT CAFs compared to the *Igf2*<sup>-/-</sup> CAFs. (K-M) Western blot (K) or flow cytometry analysis (L and M) showing the expression of IGF2 in the hCAFs or mCAFs treated with rTGF- $\beta$ 1 (10 ng/ml) for different time points or exposed with rTGF- $\beta$ 1 for 24 h in the indicated concentrations. *P* values are from an unpaired Student's t-test (D and H) and one-way ANOVA (E, L, and M). *R* value is from Pearson's correlation coefficient (B and I).

**Figure S3. IGF2 deficiency does not impact mouse T cell homeostasis, related to Figure 2.**

(A) Genotyping to verify knockout of IGF2 in the mice. (B) IF analysis showing the expression of IGF2 in the CAFs within tumors from *Igf2*<sup>-/-</sup> and *Igf2* cKO mice. Scale bar, 100  $\mu$ m. (C) Western blot analysis showing the expression of IGF2 in the CAFs from EO771 tumors in WT, *Igf2* cKO, and *Igf2*<sup>-/-</sup> mice. (D) Percentage of total or CD44<sup>high</sup> CD62L<sup>low</sup> CD4<sup>+</sup> and CD8<sup>+</sup> T cells from WT, *Igf2*<sup>-/-</sup>, and *Igf2* cKO mice (n = 5 mice per group). PLNs, peripheral lymph nodes; MLNs, mesenteric lymph nodes. (E) Migration changes of T cells cocultured with WT or *Igf2*<sup>-/-</sup> CAFs treated with linsitinib (5  $\mu$ M) or recombinant mouse IGF2 protein (10  $\mu$ M). (F) Expression level of IGF2 in shNC or shIGF2 human CAFs. (G) Migration changes of T cells cocultured with shNC or shIGF2 human CAFs treated with linsitinib (5  $\mu$ M) or recombinant human IGF2 protein (10  $\mu$ M). (H) The gating strategy of flow cytometry for TME analysis in this study. Data are presented as mean  $\pm$  s.e.m (D, E, and G). *P* values are from a one-way ANOVA (E and G) and two-way ANOVA (D).

**Figure S4. Inhibition of IGF2 in CAFs promotes T cell infiltration, related to Figure 2.**

(A) Genotyping to verify conditional knockout of IGF2 in the mice. (B) Percentage of infiltrating CD8<sup>+</sup> T cells and tumor growth in the B16-F10 tumor-bearing WT or *Igf2* cKO mice (n = 5 mice per group). (C) Tumor growth of MC38 tumors with indicated treatment. CD8<sup>+</sup> T cells were depleted by anti-CD8 $\alpha$  antibody (10 mg/kg) in WT or *Igf2*<sup>-/-</sup> mice (n = 10 mice per group). (D) Comparison of CD8<sup>+</sup> T cell migration, proliferation (CFSE dilution), and cytotoxic/cytolytic activities (IFN- $\gamma$ <sup>+</sup> and TNF- $\alpha$ <sup>+</sup>) between WT and *Igf2*<sup>-/-</sup> CD8<sup>+</sup> T cells was analyzed by flow cytometry (n = 3). (E and F) Percentage of infiltrating CD8<sup>+</sup> T cells and tumor growth in 4T1 model (E) and CT26 model (F) (n = 5 mice per group). (G) Tumor growth of 4T1 tumors with indicated treatment. CD8<sup>+</sup> T cells were depleted by anti-CD8 antibody (10 mg/kg) in BALB/c mice (n = 6-7 mice per group). Data are presented as mean  $\pm$  s.e.m (B, C, D, E, and G). *P* values are from the two-way ANOVA (B, C, E-G) and two-tailed unpaired Student's t-test (B, D-F).

**Figure S5. IGF2 loss significantly enhances T cell function and remodels the TME, related to Figure 2.**

(A) The gating strategy of flow cytometry for T cell function analysis. (B) Percentage of IFN- $\gamma$ <sup>+</sup> and TNF- $\alpha$ <sup>+</sup> CD8<sup>+</sup> T cells in the TME of B16-F10 tumor-bearing WT or *Igf2* cKO mice (n = 5 mice per group). (C) Chord diagram showing the correlation between IGF2 and markers of CD8<sup>+</sup> cytotoxic T lymphocyte (CTL) in the TNBC cohort from TCGA database. (D) t-Distributed Stochastic Neighbor Embedding (tSNE) showing a plot of tumor-infiltrating lymphocytes (TILs) within EO771 tumors, with color-coded clusters overlaid for visual differentiation. (E) The ratio of immune cells in the TME of EO771, MC38, and B16-F10 tumors in the WT or *Igf2* cKO mice was analyzed by flow cytometry (n = 5 mice per group). Data are presented as mean  $\pm$  s.e.m. (B). *P* values are two-tailed unpaired Student's t-test (B and E). Pearson's correlation coefficient is calculated (C). \**P* < 0.05, \*\**P* < 0.01.

**Figure S6. Marker expressions of cell clusters in the EO771 tumors based on scRNA-seq, related to Figure 3.**

(A) Lineage-defining genes in cell clusters based on scRNA-seq analysis of EO771 tumors. (B) Volcano plots showing the differentially expressed genes in the cell clusters in EO771 tumors. (C) Percentage of cell clusters in the EO771 tumors from WT or *Igf2* cKO mice. (D) The expression of fibroblast cluster markers. (E) Heatmap showing the expression of indicated genes in the fibroblast cluster from EO771 tumors. (F) Trajectory analysis of fibroblast cell types. (G) The density of cell types of fibroblast subsets at different times. (H) The expression of IGF2 in the fibroblast subsets in EO771 tumors. *P* values are one-way ANOVA (B and H).

**Figure S7. IGF2 enhances CAFs proliferation and stimulates CAFs to release CXCL12 and express PD-L1, related to Figure 4.**

(A) Enrichment of fibroblasts in the TME of IGF2-high or IGF2-low TNBC and COAD tissues from the TCGA database. (B and C) Proliferation of WT or *Igf2*<sup>-/-</sup> CAFs (B) and shNC or sh*IGF2* CAFs (C) treated with linsitinib (5  $\mu$ M) or recombinant IGF2 protein (10  $\mu$ M). (D) Enrichment plot for collagen formation signaling by GSEA in RNA-seq data from WT CAFs versus *Igf2*<sup>-/-</sup> CAFs. (E) Analysis of collagen deposition by picrosirius red staining in the MC38 tumors from WT, *Igf2*<sup>-/-</sup>, *Igf2* cKO mice. Scale bar, 500  $\mu$ m. (F) Heatmap showing the differentially expressed genes in the shNC and sh*Igf2* CAFs (n = 3). (G) The expressions of CXCL12 and PD-L1 on the shNC or sh*IGF2* CAFs treated with linsitinib (5  $\mu$ M) or recombinant IGF2 protein (10  $\mu$ M) were analyzed by flow cytometry (n = 3). Data are presented as mean  $\pm$  s.e.m (A, B, and G). *P* values are from a two-tailed unpaired Student's t-test (A) and one-way ANOVA (B, C, and G).



**Figure S8. Spatial transcriptomic analysis reveals that the interaction between CAFs and T cells is mediated by CXCL12 and PD-L1 signaling, related to Figure 4.**

(A) PD-L1 signaling among cell clusters in spatial locations in IGF2-high or IGF2-low COAD tumors. The line thickness denotes the strength of the interactions. (B) Interaction between ligands and their receptors in the CXCL signaling in IGF2-high or IGF2-low COAD tumors.

**Figure S9. Inhibiting the IGF2 pathway in CAFs markedly suppresses CAFs proliferation and enhances the infiltration and function of T cells, related to Figure 5.**

(A) Enrichment of signaling pathways in CAFs based on the stRNA-seq analysis. (B) Expression level of phosphorylation of Akt protein in the BRCA and COAD from TCGA database. (C and D) Activation of Akt signaling pathway in the shNC or shIGF2 human (C) or mouse (D) CAFs was assessed by western blot. (E) Proliferation of WT or *Igf2*<sup>-/-</sup> CAFs treated with MK2206 (10  $\mu$ M) or SC79 (10  $\mu$ M) (n = 3). (F) GSEA analysis showing the relationship between IGF2, IGF1R, CXCL12, and the PI3K/Akt signaling pathway in the BRCA cohort from the TCGA database. (G) Expression of key proteins in the Akt signaling pathway in the shNC or shIGF1R human CAFs was assessed by western blot. (H) Proliferation of shNC or shIGF1R human CAFs. (I) Percentage of TNF- $\alpha$ <sup>+</sup> CD8<sup>+</sup> T cells cocultured with shNC or shIGF1R CAFs (n = 3). (J and K) Percentage of infiltrating CD8<sup>+</sup> T cells (J), percentage of IFN- $\gamma$ <sup>+</sup> and TNF- $\alpha$ <sup>+</sup> CD8<sup>+</sup> T cells (K) in the indicated groups (n = 5). (L) Tumor growth of 4T1 tumors in the indicated groups (n = 5 mice per group). Data are presented as mean  $\pm$  s.e.m. (B, E, H-L). *P* values are from a two-tailed unpaired Student's t-test (B, J and K) and one-way ANOVA (E, H, and I), and two-way ANOVA (L).

**Figure S10. Blockade of IGF2/IGF1R axis significantly enhances the therapeutic efficacy of ICB, related to Figure 6.**

(A) IGF2 expression in the mammary T11 tumors treated with anti-PD1 and anti-CTLA4. (B-D) Tumor growth and mice survival (B), percentage of infiltrating CD8<sup>+</sup> T cells (C), percentage of IFN- $\gamma$ <sup>+</sup> and TNF- $\alpha$ <sup>+</sup> CD8<sup>+</sup> T cells (D) in the MC38 tumor-bearing WT or *Igf2* cKO mice treated with anti-IgG or anti-CTLA4 antibodies (5 mg/kg) (n = 5 mice per group). (E) Tumor growth of MC38 tumors in the WT and *Igf2* cKO mice treated with vehicle or linsitinib (10 mg/kg) (n = 5 mice per group). (F) Tumor growth and percentage of immune cells in TME of 4T1 tumors in the indicated groups (n = 5 mice per group). Data are presented as mean  $\pm$  s.e.m. (A-F). *P* values are from a two-tailed unpaired Student's t-test (A) and one-way ANOVA (C and D) and two-way ANOVA (B, E, and F) and log-rank test (B).

**Figure S11. IGF2/IGF1R axis positively correlates with CXCL12, CD274, and collagen-associated genes, related to Figure 7.**

(A and B) Heatmap showing the expressions of indicated genes in both human TNBC (A) and COAD (B). (C) Co-expression analysis of collagen-associated genes in the IGF2-high or IGF2-low TNBC from the TCGA database. (D-G) Correlation between CXCL12 and IGF2 (D and E) or IGF1R (F and G) in BRCA or COAD from TCGA database. R value is from Pearson's correlation coefficient (D-G).

## **SUPPLEMENTAL METHODS**

### ***RNA sequencing and data analysis***

Total RNA was extracted from WT and *Igf2*<sup>-/-</sup> CAFs, shNC and sh*IGF2* CAFs, TNBC and COAD tumor tissues using Trizol reagent (15596026, Invitrogen). After dispatching RNA samples to ANNOROAD for library preparation and sequencing, the raw fastq files from RNA sequencing on NovaSeq (Illumina) were employed to generate gene read counts via htseq, enabling the subsequent computation of transcripts per million (TPM). Differentially expressed genes were identified using the R package DESeq2, applying filtering parameters including fold change above 2, adjusted  $P < 0.05$ , and an average log<sub>2</sub> (TPM) in the high expression group exceeding 0.

### ***Human samples***

Tumor tissues and blood plasma samples were procured from patients diagnosed with TNBC, with additional tumor specimens collected from individuals with COAD. Blood plasma samples were obtained from patients diagnosed with advanced lung (47 samples), colon (12 samples), and breast (10 samples) cancers prior to receiving anti-PD-1 treatment with Camrelizumab from December 24, 2019 to February 27, 2021. Evaluation of treatment response was conducted in adherence to the Response Evaluation Criteria in Solid Tumors (RECIST version 1.1), focusing on the percentage change in target lesion diameter utilizing pre-treatment and treatment imaging scans.

### ***Cell isolation***

Tumor specimens were mechanically dissociated using scissors and subsequently underwent enzymatic digestion with Liberase (590706, 2 mg/mL, Roche). The resulting

mixture was filtered through 70- $\mu$ m filters (bs-70-xbs, Biosharp) to generate single-cell suspensions. After lysis of red blood cells, the cells were washed and then resuspended in a flow cytometry buffer for subsequent analyses. For CAFs isolation, the methodology for this study was adapted from a previous publication (1). Tumor samples were mechanically dissociated and enzymatically digested with Liberase (590706, 2 mg/mL, Roche) in DMEM for 45 minutes at 37°C. Single-cell suspensions were obtained by passing the digested tissues through 70- $\mu$ m filters. The cells were cultured in DMEM supplemented with 10% FBS (04-001-1Acs, BI) and 1% penicillin-streptomycin (15140122, Gibco). CAFs were identified as cells that adhered to the culture dish within 15 minutes, while non-adherent cells were discarded.

### ***Single-cell RNA sequencing***

Single-cell suspensions were obtained from EO771 tumors in WT or *Igf2* cKO mice. A composite sample was generated by randomly pooling three tumor specimens from the identical cohort, which was subsequently dispatched to ANNOROAD (Beijing, China) for sequencing analysis. The cells were counted and loaded onto the 10X device from 10X Genomics. As per the manufacturer's guidelines, the samples were processed and sequenced on an Illumina NovaSeq 6000 platform by Illumina, Inc. located in San Diego, CA. The Cell Ranger analysis pipeline (v1.2) was employed to perform sample demultiplexing, barcode processing, alignment, filtering, unique molecular identifier counting, and aggregation of sequencing runs. Subsequent analyses were performed in R using the Seurat package (version 5.0.1). Cells exhibiting high expression of multiple cell population-specific marker genes, indicating potential doublets or multiplets, were

removed based on gene expression profiles. Additionally, cells with less than 200 genes or over 7,000 genes detected, and those with mitochondrial transcripts comprising over 10% of the total library, were excluded from further analysis. The function "Find Variable Features" was utilized to identify genes with high variability. Principal Component Analysis was conducted using the top 2,000 variable genes. Uniform Manifold Approximation and Projection (UMAP) was employed for dimensionality reduction to visualize inferred cell clusters, leveraging the top 15 principal components. To categorize immune cell populations, a Wilcoxon rank-sum test was performed for a differential expression analysis between each cluster and all other cells. Following this, the top differential expression outcomes for each cluster were compared against canonical markers representing a diverse set of immune cell populations. This led to the identification of a consensus panel of transcriptional markers for each of the 10 clusters.

### ***Spatial transcriptomics data analysis***

The stRNA-seq slides contained two identical capture areas from two human COAD samples, one with high IGF2 expression and the other with low IGF2 expression. Gene expression data from the spatial transcriptomics (ST) slides was captured employing the Visium Spatial platform by 10x Genomics, utilizing spatially barcoded mRNA-binding oligonucleotides as per the default protocol. Raw sequencing reads from the stRNA-seq were subjected to quality checks and mapped utilizing Space Ranger (version 1.1). The resulting gene-spot matrices obtained post-processing of ST data from both ST and Visium samples were analyzed using the Seurat package (version

5.0.1) in R. Spots were filtered for a minimum detected gene count of 200 genes, and genes with fewer than 10 read counts or expressed in fewer than 3 spots were excluded. Normalization across spots was carried out with the LogVMR function. Dimensionality reduction and clustering were conducted using independent component analysis (PCA) with a resolution of 0.8 and the first 30 principal components. Spatial feature expression plots were created using the SpatialFeaturePlot function in Seurat. The library was prepared, and subsequent sequencing was executed on a NovaSeq 6000 platform.

### ***Bioinformatics***

The tumor immune microenvironment in human TNBC and COAD was classified according to previously established methods (2). In brief, the immune-inflamed type was classified as brisk diffuse, and the immune-excluded type was classified as brisk band-like. In our RNA-sequencing study of TNBC and COAD samples, we identified two subtypes: immune inflamed and immune excluded. We used TPM data and the limma R package to analyze differential gene expression, resulting in the identification of upregulated genes in immune excluded TNBC (TNBC DEGs) and COAD (COAD DEGs) samples. A Venn diagram was then used to compare and identify overlapping DEGs between the two cancer subtypes. Moreover, we employed the "clusterProfiler" package in R to perform Kyoto Encyclopedia of Genes and Genomes (KEGG) enrichment analysis, aiming to identify relevant signaling pathways associated with IGF2. The assessment of stromal cell enrichment in the TME was conducted using the CIBERSORT and MCPcounter algorithms. For GSEA, version 4.0.3 of the GSEA software was utilized, while analysis of scRNA-seq data was carried out using the



Seurat R package. Terms with statistical significance ( $P < 0.05$ ) and at least 3 enriched genes were considered in the analysis.

### ***Tumor models***

Following the administration of tamoxifen, MC38 and CT26 cells were subcutaneously injected at a concentration of  $1.0 \times 10^5$  cells, while B16-F10 cells were injected at a concentration of  $1.5 \times 10^5$  cells into the right hind leg region of the mice. In the mammary tumor model, 4T1 and EO771 cells were transplanted into the mammary fat pad of various mouse strains, including wild-type Balb/c, iDTR<sup>flox/flox</sup>, iDTR<sup>flox/flox</sup>*S100a4*<sup>CreERT</sup>, *Igf2*<sup>-/-</sup>, *Igf2*<sup>flox/flox</sup>, or *Igf2*<sup>flox/flox</sup>*S100a4*<sup>CreERT</sup> C57BL/6 mice. Tumor size was calculated using the formula: volume (mm<sup>3</sup>) = (long axis) × (short axis)<sup>2</sup>/2. Tumor volume was monitored starting from day 5 post-tumor inoculation and then every two days. In certain experiments, tumor-bearing mice were euthanized on day 20, and the tumors were harvested for flow cytometry analysis. In combinatory experiments, tumor monitoring commenced on day 5 post-tumor inoculation and continued every two days. Survival time of mice was recorded by monitoring tumor volumes, and mice were euthanized if the tumor volume exceeded 2000 mm<sup>3</sup> in accordance with ethical guidelines for experimental animal use. Linsitinib (S1091, 10 mg/kg/day, Selleck) was administered orally for five consecutive days, beginning on day 5 post-tumor inoculation. The anti-PD-1 antibody (10 mg/kg) and anti-CTLA-4 antibody (5 mg/kg) were intraperitoneally injected on days 5, 7, 9, 11, and 13 following tumor inoculation. In the T cell depletion experiments, mice received anti-CD8

antibody (10 mg/kg) every 3 days, starting 3 days prior to MC38 or 4T1 tumor inoculation. The depletion of CD8<sup>+</sup> T cells was confirmed through flow cytometry.

### ***Flow cytometry***

Live cells were distinguished using Fixable Viability Dye eFluor 450. In order to block Fc receptors, cells were pre-incubated with purified anti-CD16/32 antibody. After washing, cells were incubated with a cocktail of primary antibodies against cell surface markers. Intracellular staining was carried out by fixing and permeabilizing cells using the Foxp3/Transcription Factor Staining Buffer Set, followed by staining with fluorochrome-conjugated antibodies targeting FOXP3. For cytokine staining, cells underwent stimulation with Cell Stimulation Cocktail, followed by staining with anti-IFN- $\gamma$  and anti-TNF- $\alpha$ . Stained cells were analyzed using a BD FACSCanto II Flow Cytometer with BD FACSDiva software (BD Biosciences), and the data were processed with FlowJo software (version 10.5.3).

### ***Mass cytometry***

As described previously, live single cells were isolated from tumor tissues for subsequent mass cytometry (CyTOF) analysis (3). Cell viability was evaluated through staining with cisplatin (25  $\mu$ M) for 1 minute, followed by labeling with a metal-tagged monoclonal antibody cocktail targeting cell surface molecule. Subsequent steps involved treating cells with Fixation/Permeabilization Buffer and staining with monoclonal antibody cocktails against intracellular proteins. Analysis was conducted utilizing the CyTOF 2 instrument at the Institute of Liver Diseases (Beijing You-an Hospital Affiliated with Capital University of Medical Sciences). The resultant CyTOF

files underwent normalization and manual gating in Cytobank software (version 9.1). Prior to Phenograph clustering analysis utilizing the R cytofkit package (version 0.99.0) on pooled samples to delineate immune subsets, data transformation was executed utilizing the cytofAsinh function. Heatmaps were generated based on the mean value of each marker in clusters, with cell frequency in each cluster determined by the ratio of assigned cell events to total CD45<sup>+</sup> cell events in the corresponding sample. Fluidigm antibodies were used for the mass cytometry analysis. All antibodies were presented in the Supplemental Table 1.

#### ***Immunohistochemistry (IHC) and immunofluorescence (IF) staining***

Standard IHC and IF staining were performed according to established protocols as previously described (4). For IHC staining, the primary antibodies employed comprised anti-CD3, anti-IGF2, and anti-SDF. In IF staining, anti- $\alpha$ -SMA (ab7817) and anti-IGF2 antibodies were utilized. Secondary antibodies conjugated with DyLight 488 or DyLight 594 specific to rabbit or mouse IgG were sourced from Thermo Fisher Scientific.

#### ***T cell migration assay***

The assays for stimulation of human and mouse T cells were previously described (5, 6). Human peripheral blood mononuclear cells (PBMCs) were stimulated with a suboptimal dose of immobilized anti-CD3/CD28 antibody. Mouse T lymphocytes were isolated from the spleens of 8-week-old C57BL/6J mice and similarly stimulated with anti-CD3/CD28 antibody. In the T cell migration assay, transwells featuring 8  $\mu$ m pore diameters were employed, whereby activated splenic T cells were seeded within the

upper chamber. In the bottom chamber, mouse or human tumor cells were cultured, along with mouse or human cancer-associated fibroblasts (CAFs) treated with or without linsitinib (5  $\mu$ M), recombinant mouse IGF2 protein (10  $\mu$ M) or human IGF2 protein (10  $\mu$ M), MK2206 (10  $\mu$ M), or SC79 (10  $\mu$ M), added 0.5 h before T cell addition to assess CAFs' impact on T cell migration. Following 6 h of migration, cells from the lower chamber were harvested, labeled with anti-CD8 antibodies, and quantified through flow cytometry analysis.

### ***ELISA***

IGF2 and CXCL12 levels in the blood plasma were measured using ELISA kits specific for IGF2 and CXCL12, respectively, following the instructions provided by the manufacturer.

### ***Western blotting***

Western blotting was carried out following the procedure described previously (7). The primary antibodies utilized in this study were IGF2, IGF1R, AKT, p-AKT, GAPDH and  $\beta$ -Actin.

### ***Gene silencing by lentiviral transduction***

Human *IGF2*- and *IGF1R*-targeting shRNAs for lentiviral production were supplied by Genecopoeia Company. Utilizing the Polyjet DNA in vitro Transfection Reagent, the lentiviral expression vector was co-transfected alongside the lentivirus packaging vectors into 293T cells. Subsequently, CAFs were stably transfected with viral particles for 48-72 h.



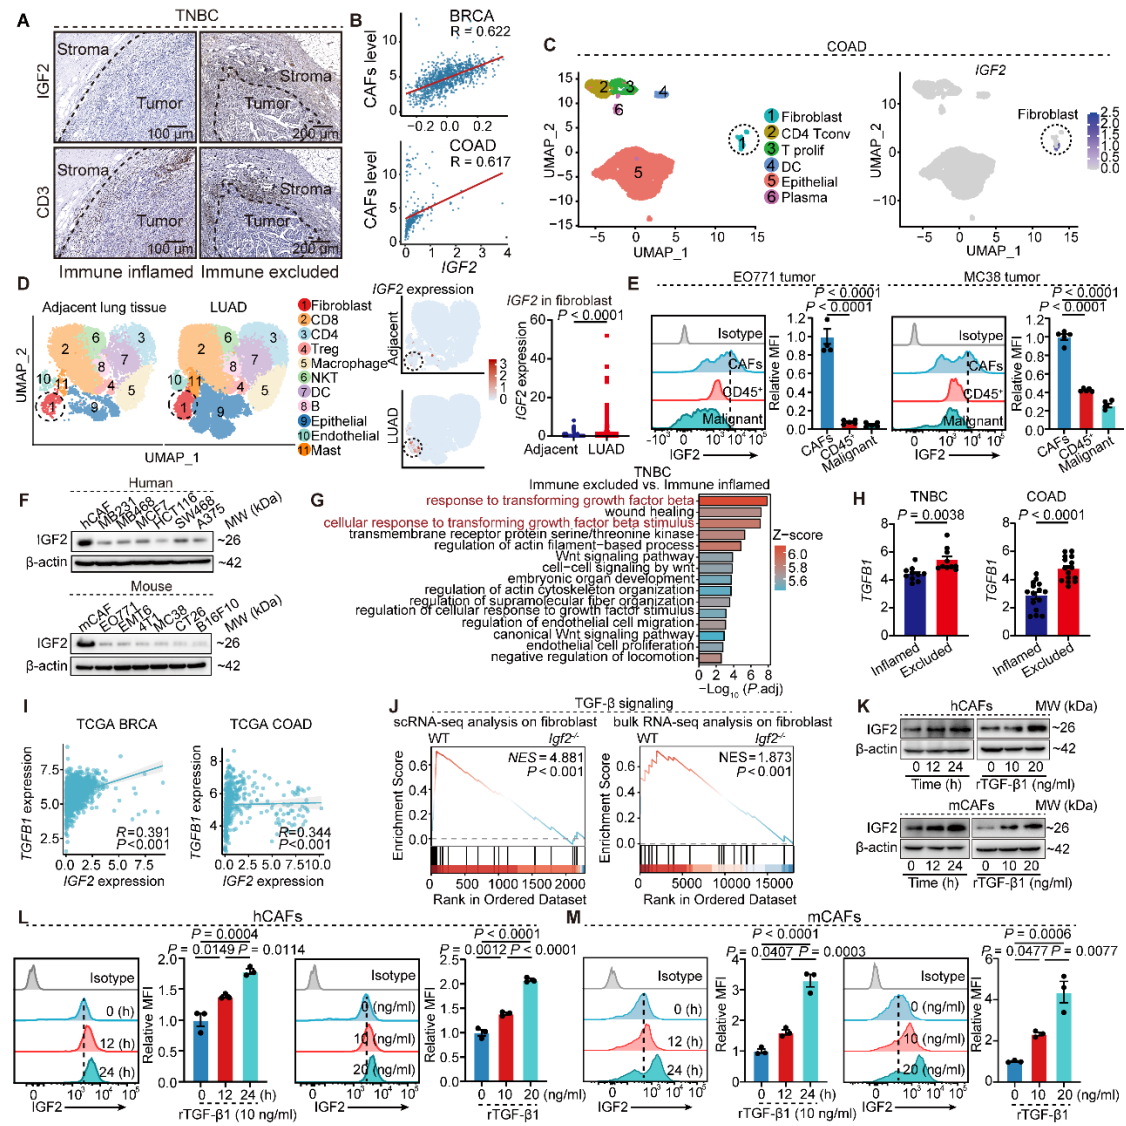

Figure S2

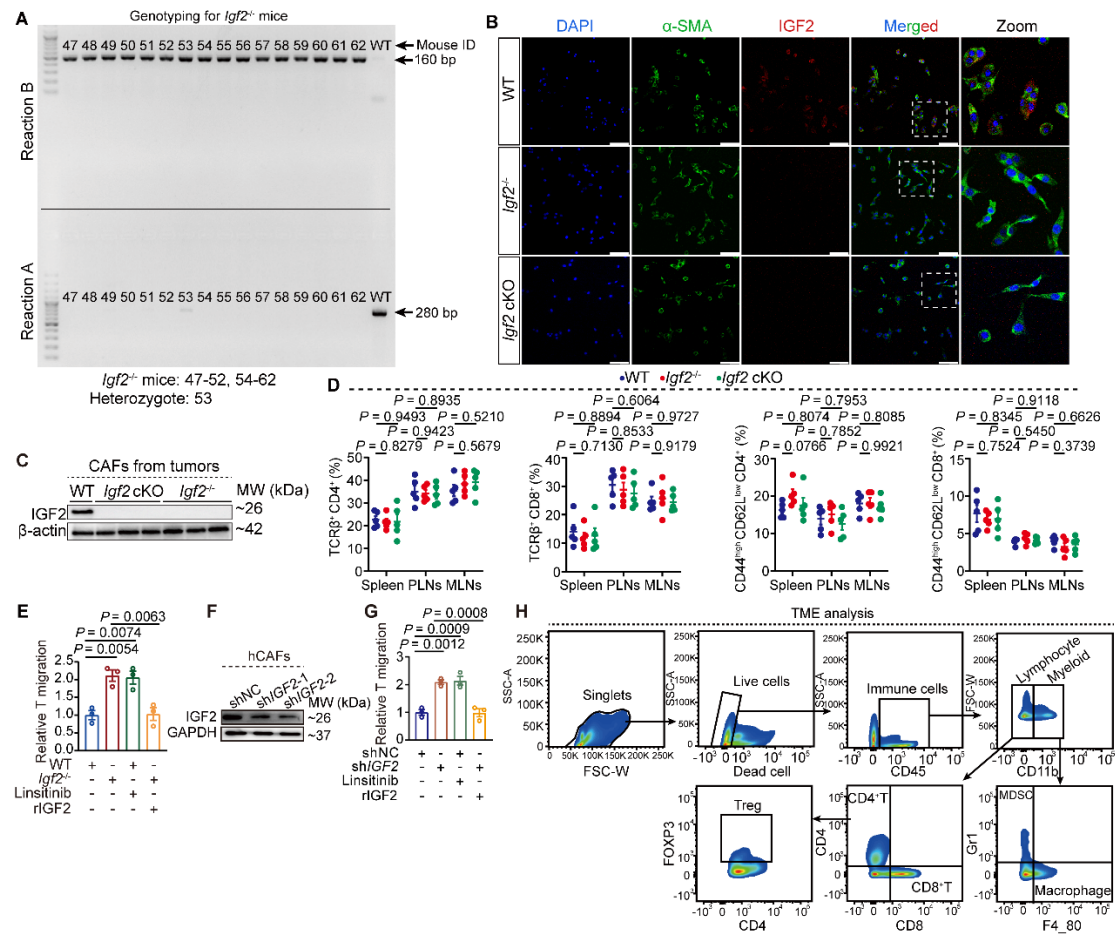

Figure S3

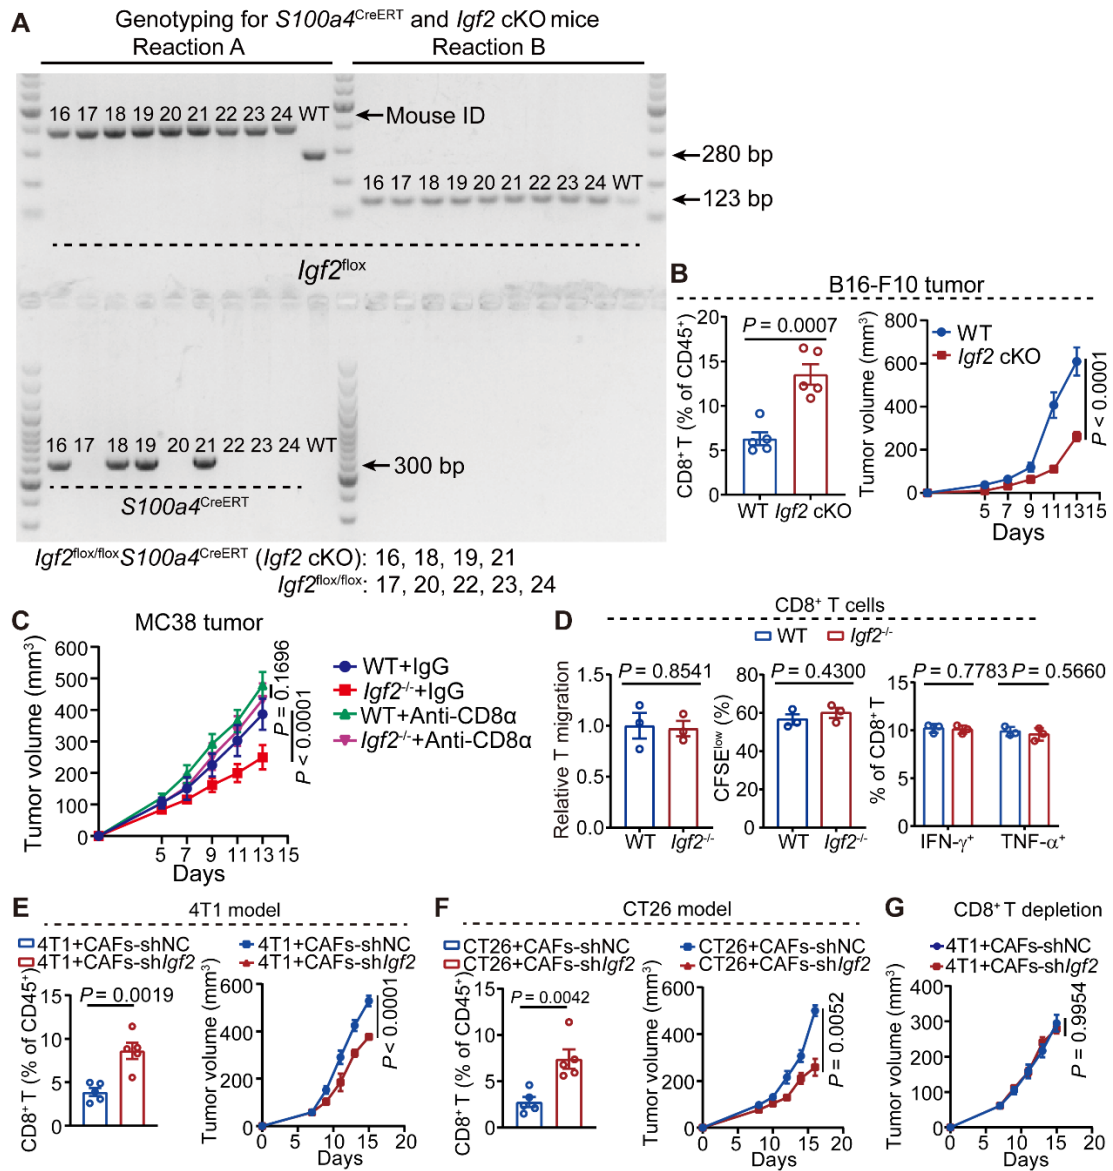

Figure S4



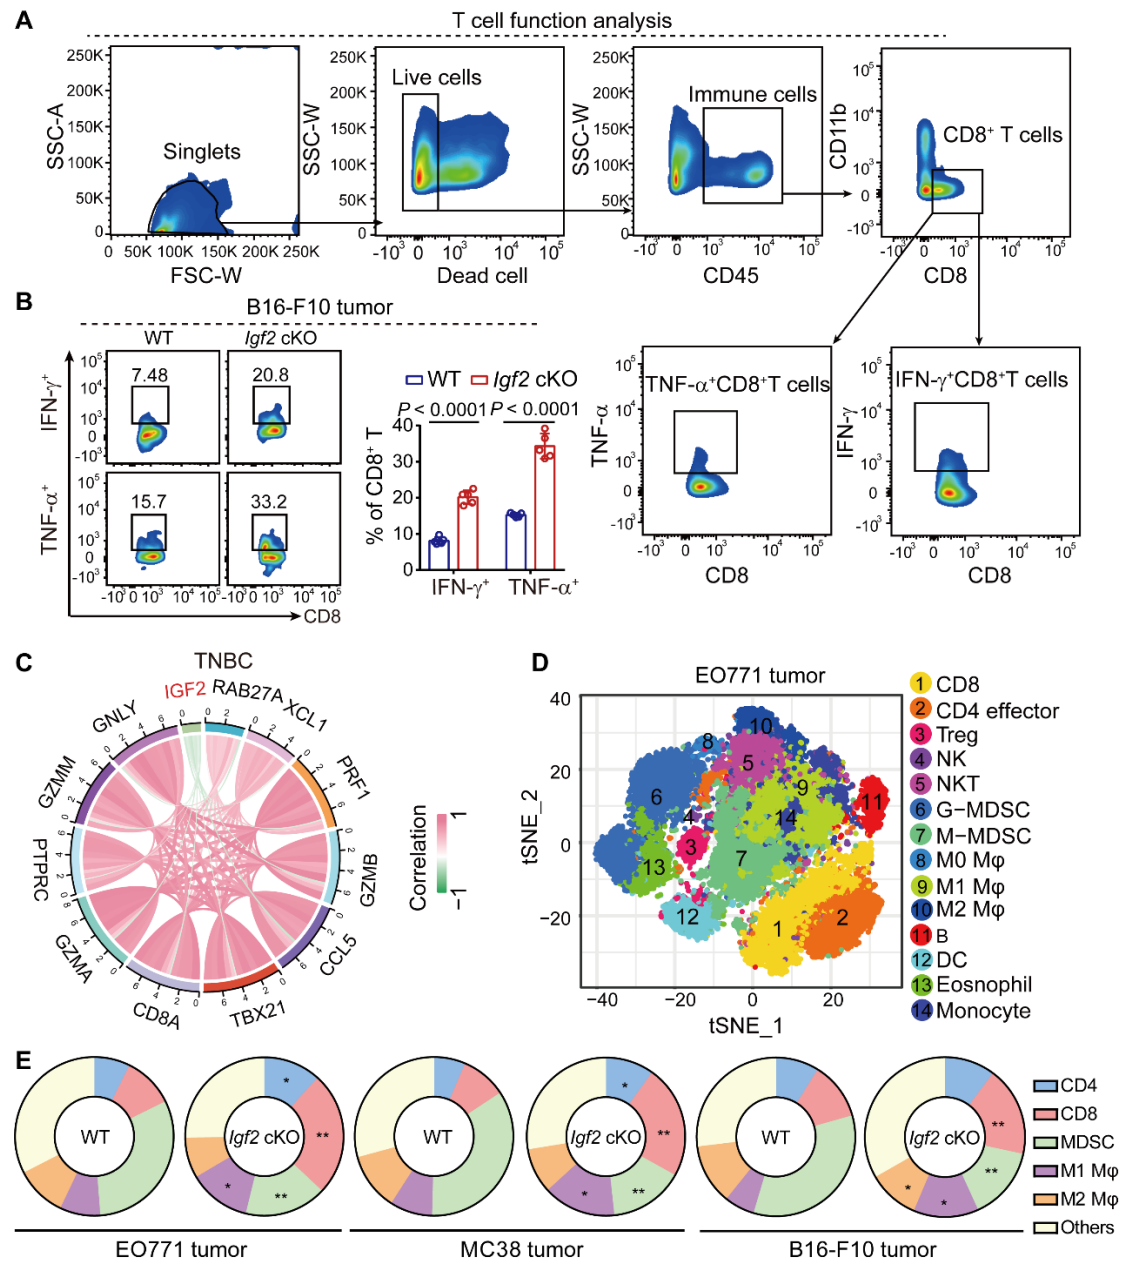

Figure S5

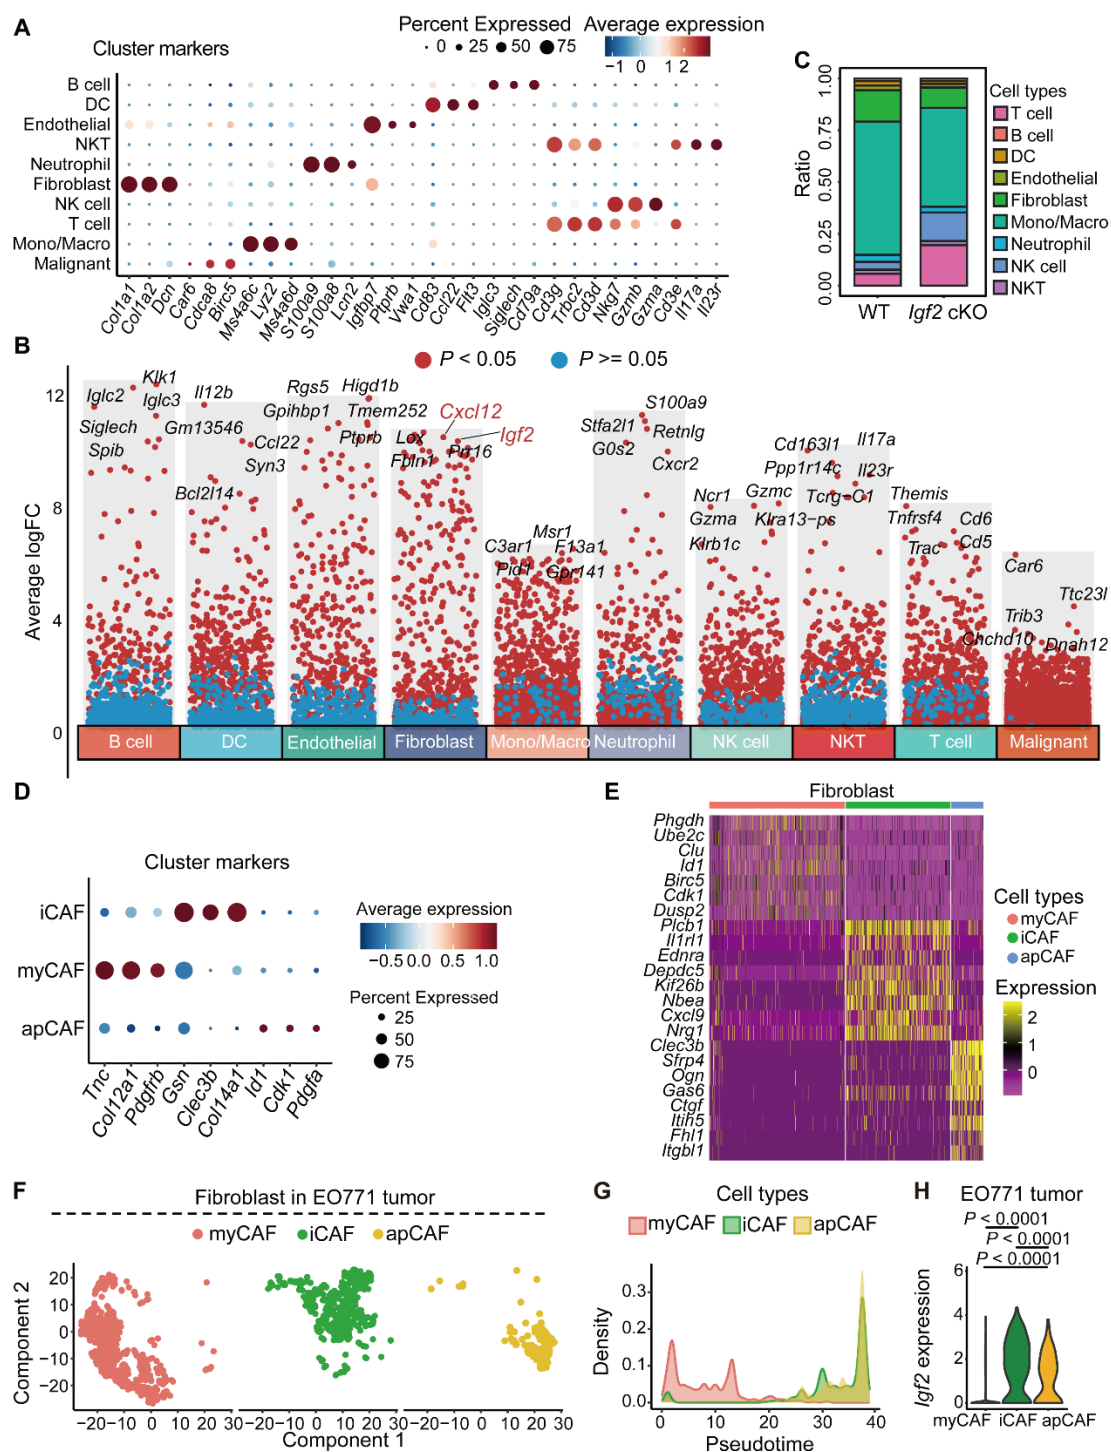

Figure S6

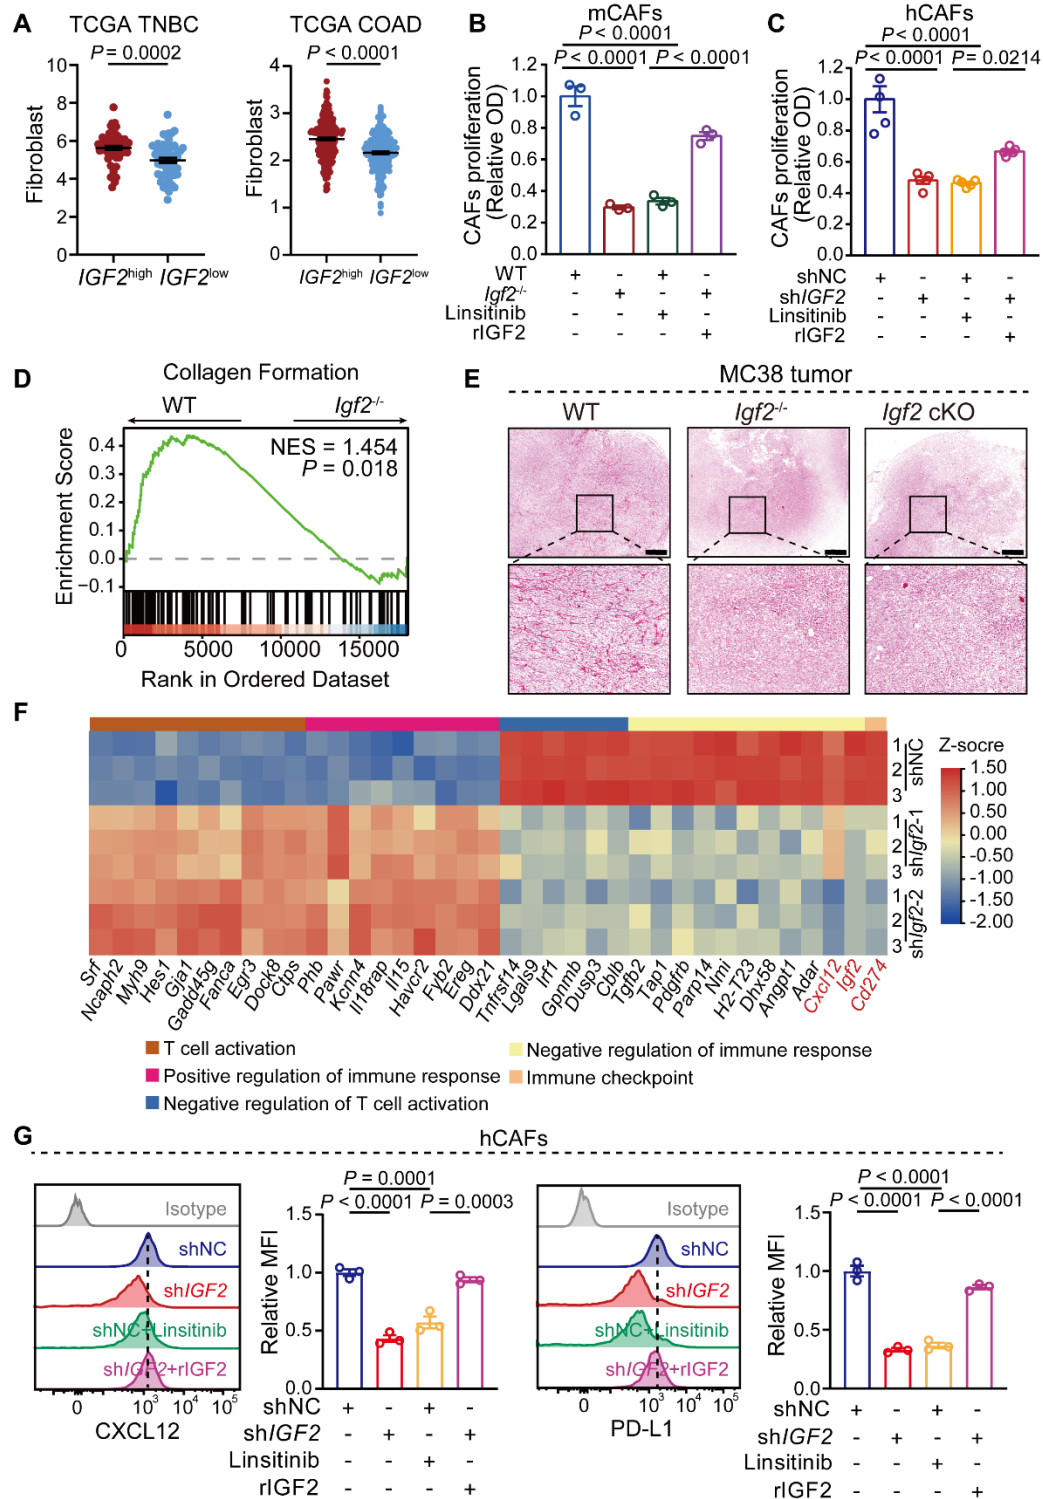

Figure S7

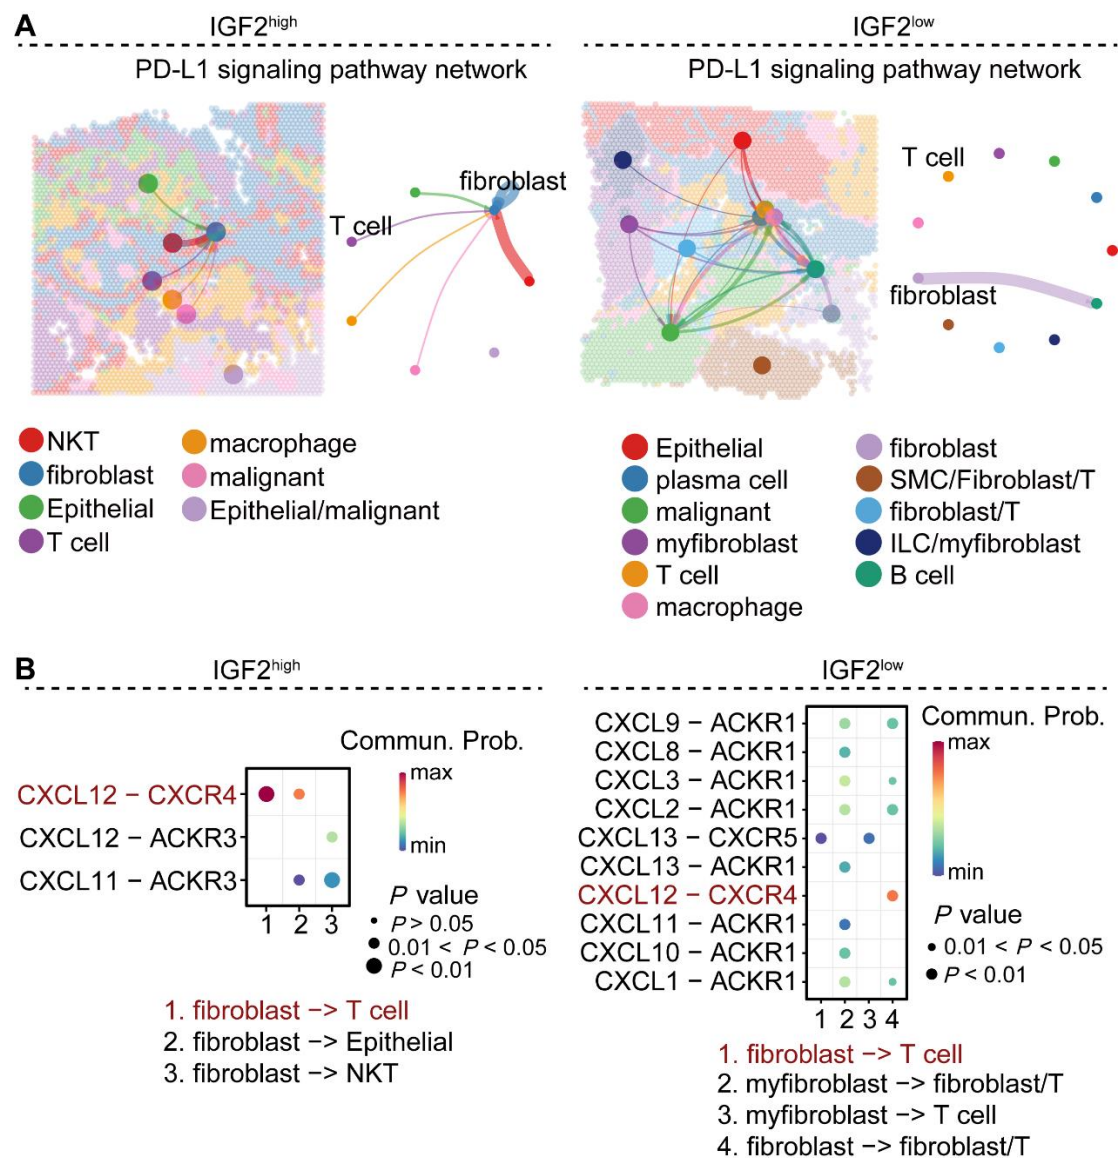

Figure S8

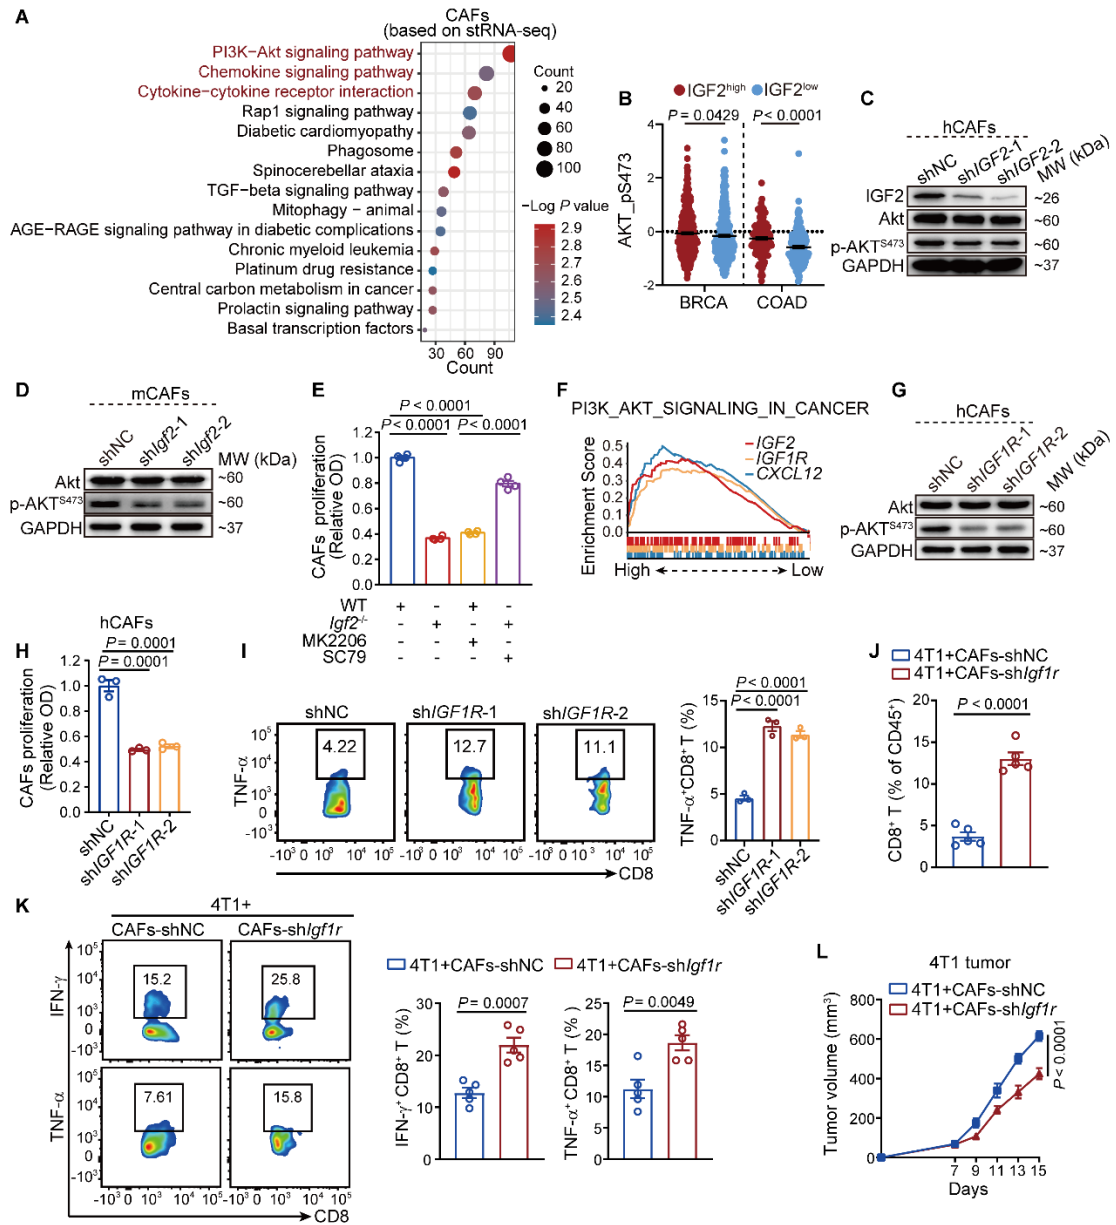

Figure S9

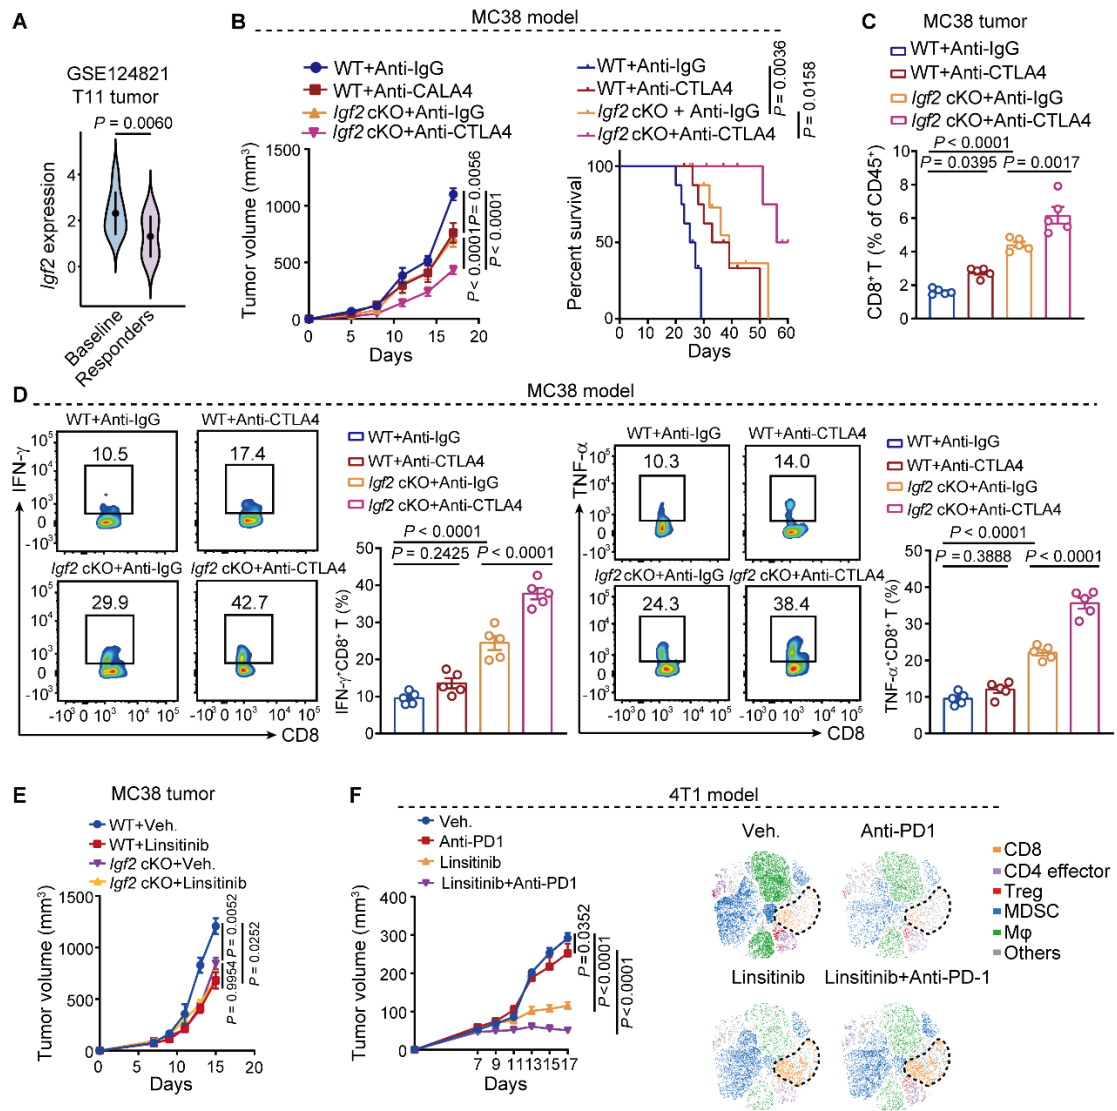

Figure S10



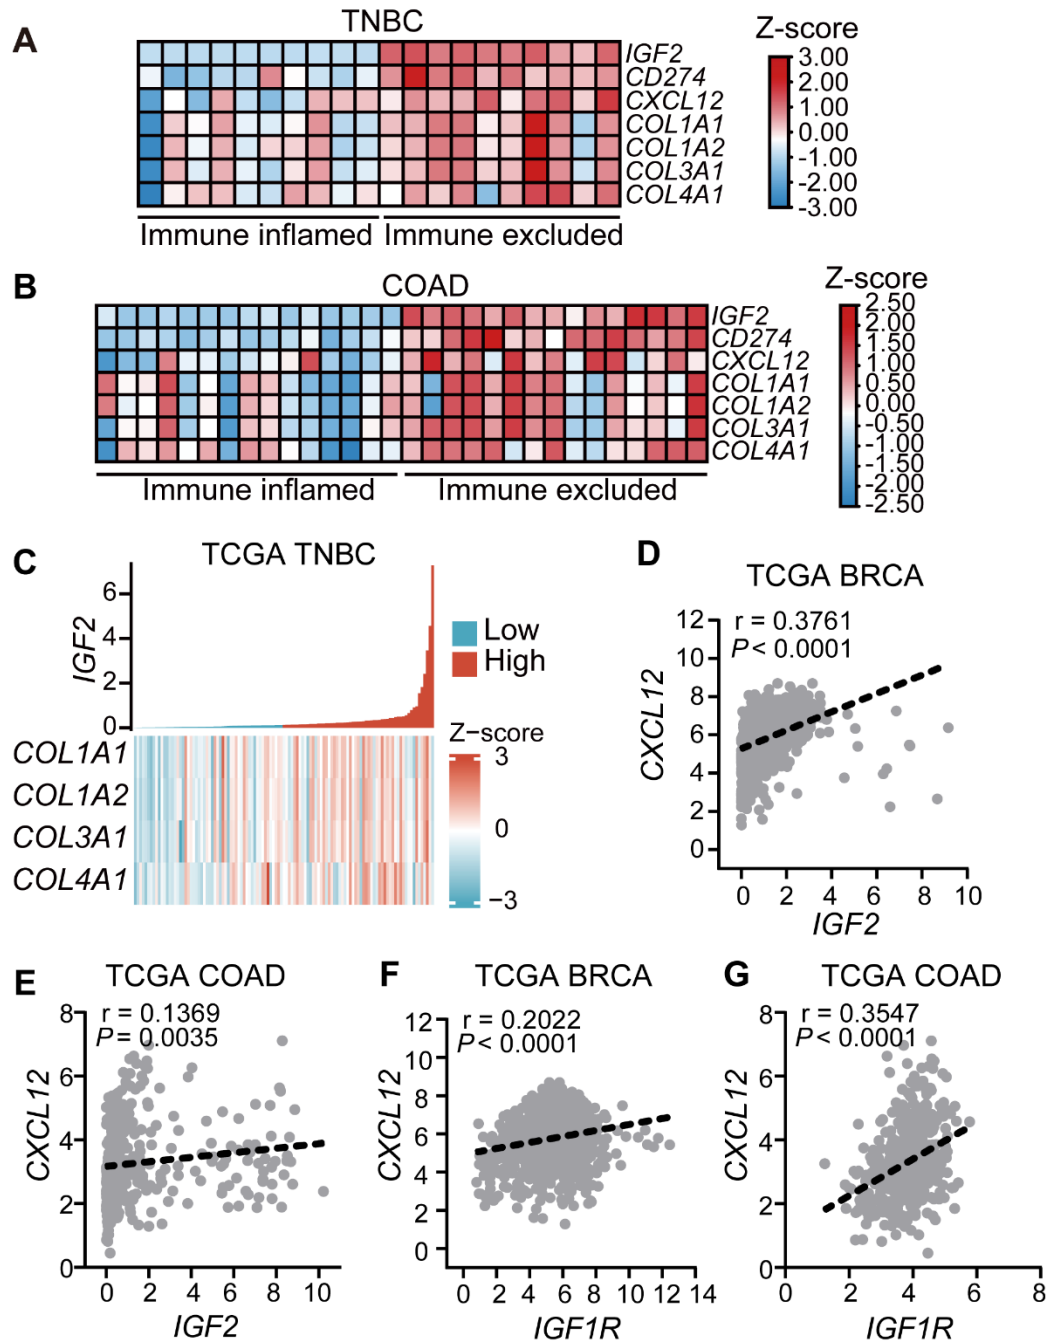

Figure S11

Table 1. Chemicals and Antibodies used in this study

| <b>Chemical</b>                                | <b>Vendors</b> | <b>Catalog no.</b> |
|------------------------------------------------|----------------|--------------------|
| Tamoxifen                                      | Sigma          | T5648              |
| Linsitinib                                     | Selleck        | S1091              |
| Diphtheria toxin                               | Sigma          | D0564              |
| Viability Dye eFluor 450                       | Invitrogen     | 65-0863-14         |
| Foxp3/Transcription Factor Staining Buffer Set | eBioscience    | 2507021            |
| Cell Stimulation Cocktail                      | Invitrogen     | 00-4975-93         |
| cisplatin                                      | MedChemExpress | HY-17394           |
| Fixation/Permeabilization Buffer               | eBioscience    | 88-8824-00         |
| MK2206                                         | MedChemExpress | HY-10358           |
| SC79                                           | MedChemExpress | HY-18749           |
| Transfection Reagent                           | SignaGen       | SL100688           |
| Human IGF2 ELISA kit                           | Sabbiotech     | EK1133-2           |
| Mouse CXCL12 ELISA kit                         | Boster         | EK0500             |
|                                                |                |                    |
| <b>Antibody</b>                                | <b>Vendors</b> | <b>Catalog no.</b> |
| anti-PD-1 antibody                             | Bioxcell       | RMP1-14            |
| anti-CTLA-4 antibody                           | Bioxcell       | 9D9                |
| anti-CD8 antibody                              | Bioxcell       | YTS 169.4          |
| anti-CD16/32 antibody                          | BioLegend      | 101302             |
| anti-CD45                                      | BioLegend      | 30F11              |
| anti-CD4                                       | BioLegend      | GK1.5              |
| anti-CD8a                                      | BioLegend      | 53-6.7             |
| anti-CD11b                                     | BioLegend      | M1/70              |
| anti-Gr-1                                      | BioLegend      | RB6-8C5            |
| anti-F4/80                                     | BioLegend      | BM8                |
| anti-CD206                                     | BioLegend      | C06.8C2            |
| anti-MHCII                                     | BioLegend      | M5/114.15.2        |
| anti-CD140a                                    | BioLegend      | APA5               |
| anti-PD-L1                                     | BioLegend      | 10F.9G2            |
| anti-FOXP3                                     | BioLegend      | MF-14              |
| anti-IFN- $\gamma$                             | BioLegend      | XMG1.2             |
| anti-CD140a                                    | BioLegend      | 16A1               |
| anti-CD45                                      | BioLegend      | 2D1                |
| anti-CD326                                     | BioLegend      | 9C4                |
| anti-TNF- $\alpha$                             | BioLegend      | MP6-XT22           |
| anti-CD44                                      | BioLegend      | IM7                |
| anti-CD62L                                     | BioLegend      | MEL-14             |
| anti-TCR $\beta$                               | BioLegend      | H57-597            |



|                                |                |           |
|--------------------------------|----------------|-----------|
| anti-CD45                      | Fluidigm       | 89Y       |
| anti-CD4                       | Fluidigm       | 175Lu     |
| anti-PD-1                      | Fluidigm       | 173Yb     |
| anti-CD11b                     | Fluidigm       | 143Nd     |
| anti-Siglec F                  | Fluidigm       | 144Nd     |
| anti-CD69                      | Fluidigm       | 153Eu     |
| anti-CD68                      | Fluidigm       | 164Dy     |
| anti-CD206                     | Fluidigm       | 169Tm     |
| anti-Tbet                      | Fluidigm       | 148Sm     |
| anti-CD103                     | Fluidigm       | 151Eu     |
| anti-CD3                       | Fluidigm       | 174Yb     |
| anti-CD14                      | Fluidigm       | 156Gd     |
| anti-CD40                      | Fluidigm       | 160Dy     |
| anti-TIGIT                     | Fluidigm       | 155Gd     |
| anti-CD127                     | Fluidigm       | 141Pr     |
| anti-B220                      | Fluidigm       | 176Lu     |
| anti-TIM3                      | Fluidigm       | 162Dy     |
| anti-CD223                     | Fluidigm       | 158Gd     |
| anti-CD25                      | Fluidigm       | 147Sm     |
| anti-F4/80                     | Fluidigm       | 159Tb     |
| anti-Ki67                      | Fluidigm       | 161Dy     |
| anti-Foxp3                     | Fluidigm       | 165Ho     |
| anti-CD19                      | Fluidigm       | 149Sm     |
| anti-GATA3                     | Fluidigm       | 145Nd     |
| anti-NK1.1                     | Fluidigm       | 142Ce     |
| anti-CD8                       | Fluidigm       | 168Er     |
| anti-CD86                      | Fluidigm       | 172Yb     |
| anti-ly-6G                     | Fluidigm       | 152Gd     |
| anti-ly-6C                     | Fluidigm       | 163Dy     |
| anti-MHCII                     | Fluidigm       | 209Bi     |
| anti-CD80                      | Fluidigm       | 171Yb     |
| anti-CTLA-4                    | Fluidigm       | 154Gg     |
| anti-CD11c                     | Fluidigm       | 150Sm     |
| anti-CD3                       | Abcam          | ab16669   |
| anti-IGF2                      | Thermo Fisher  | MA5-17096 |
| anti-SDF1                      | Huabio         | ER1902-35 |
| anti- $\alpha$ -SMA            | Abcam          | ab7817    |
| recombinant mouse IGF2 protein | Abcam          | ab233634  |
| human IGF2 protein             | Abcam          | ab155617  |
| human TGFB1 Protein            | MedChemExpress | HY-P7118  |
| mouse TGFB1 Protein            | MedChemExpress | HY-P70648 |

|                      |                              |            |
|----------------------|------------------------------|------------|
| anti-IGF1R           | Cell Signaling<br>Technology | 17174      |
| anti-AKT             | Cell Signaling<br>Technology | 4691       |
| anti-p-AKT           | Cell Signaling<br>Technology | 4060       |
| anti-GAPDH           | Proteintech                  | 60004-1-Ig |
| anti- $\beta$ -Actin | Proteintech                  | 66009-1-Ig |

## References

1. Kim HJ, et al. Reprogramming of cancer-associated fibroblasts by apoptotic cancer cells inhibits lung metastasis via Notch1-WISP-1 signaling. *Cell Mol Immunol.* 2022;19(12):1373-1391.
2. Jiang P, et al. Signatures of T cell dysfunction and exclusion predict cancer immunotherapy response. *Nat Med.* 2018;24(10):1550-1558.
3. Li H, et al. The allergy mediator histamine confers resistance to immunotherapy in cancer patients via activation of the macrophage histamine receptor H1. *Cancer Cell.* 2022;40(1):36-52.e39.
4. Cerezo-Wallis D, et al. Midkine rewires the melanoma microenvironment toward a tolerogenic and immune-resistant state. *Nat Med.* 2020;26(12):1865-1877.
5. Chapoval AI, et al. B7-H3: a costimulatory molecule for T cell activation and IFN-gamma production. *Nat Immunol.* 2001;2(3):269-274.
6. Sica GL, et al. B7-H4, a molecule of the B7 family, negatively regulates T cell immunity. *Immunity.* 2003;18(6):849-861.
7. Wu Y, et al. FGFR blockade boosts T cell infiltration into triple-negative breast cancer by regulating cancer-associated fibroblasts. *Theranostics.* 2022;12(10):4564-4580.
